# Supplementary material for: Integrating in-situ data and remote sensing for spatiotemporal assessment of alpine vegetation
Source: Research Square preprint supplement (doi:10.21203/rs.3.rs-8491360/v1), 2026-01-08
Supplement: Supplementary file 1 [file 21282b9348dec52eb9a74698.docx]

***Appendix 1***. Spectral Indices and Land Surface Temperature in Google Earth Engine

To calculate the spectral indices SAVI (Soil Adjusted Vegetation Index), NDMI (Normalized Difference Moisture Index) and Land Surface Temperature (LST), we developed a custom processing workflow in Google Earth Engine (GEE). This routine integrated high-resolution field sampling data with a multi-year time series of Sentinel-2 imagery to enable consistent extraction of vegetation and soil-related indicators. Sampling plots were imported into GEE from a vector dataset stored as a user asset. Around each plot, circular buffer zones were generated with radii of 10, 50 and 100 meters, allowing us to evaluate the spatial sensitivity and ecological signal stability of remote sensing-derived indices across different spatial extents.

We used the *COPERNICUS/S2_SR_HARMONIZED* collection, filtering the dataset to include only scenes acquired between January 2019 and December 2024 and spatially constrained to the buffered sampling areas. Only the bands required for index computation: B4 (red), B8 (near-infrared) and B11 (shortwave infrared), were retained. A two-step filtering process was implemented to ensure data quality: first, a scene-level filter excluded images with more than 30% cloud cover; second, pixel-level filtering was applied using the Cloud Probability layer (MSK_CLDPRB), the Scene Classification Layer (SCL) and optionally the QA60 and cloud/snow classification masks, although the latter were disabled by default due to inconsistent temporal coverage. After preprocessing, spectral indices were computed and appended as new bands to each image in the filtered collection. For each sampling buffer, SAVI and NDMI values were extracted using spatial reduction at 10-meter resolution, with acquisition dates recorded for each observation. In parallel, Land Surface Temperature (LST) was estimated by calibrating linear regression models using Landsat 8 thermal data (*LANDSAT/LC08/C02/T1_L2*) as reference. Reflectance and thermal bands were used to fit both ordinary and robust linear regressions and the resulting coefficients were transferred to Sentinel-2 imagery to generate LST proxies (LST_OLS and LST_RLS) for each date in the series. This cross-sensor approach allowed consistent LST estimation across the Sentinel-2 time series, despite its lack of thermal bands.

The final dataset, including values of SAVI, NDMI and LST (OLS and RLS) for each plot and date, was exported in CSV format. Attributes included plot ID, relevé number, acquisition date and the calculated spectral and temperature indicators and were used in subsequent statistical analyses.

// This code calculates SAVI, NDMI and LST values for a time series.

// Import the shapefiles:

var plots = ee.FeatureCollection("projects/ee-gonzalohdzromero/assets/40_muestras_ok2_wgs84");

Map.addLayer(plots, {}, 'Sampling plots');

print('Sampling plots', plots);

// Create a 100 m buffer around each point

var plots = plots.map(function(feature) {

return feature.buffer(100); // 100-meter buffer

});

Map.addLayer(plots, {color: 'red'}, 'Sampling plots buffer (100 m)');

print('Sampling plots buffer (100 m)', plots);

Map.centerObject(plots, 10);

// SENTINEL-2 IMAGE COLLECTION

var startDate = 2019; // First year of the study period

var endDate = 2025; // Last year of the study period

// Unfiltered image collection

var s2 = ee.ImageCollection('COPERNICUS/S2_SR_HARMONIZED')

.filterBounds(plots)

.filterDate(String(startDate) + '-01-01', String(endDate) + '-12-31')

.select(['B4', 'B8', 'B11']); // Select bands

// Count unfiltered images

var totalImagesBeforeFilter = s2.size();

print('Sentinel-2 - Number of unfiltered images: ', totalImagesBeforeFilter);

// Scene-level filtering

var s2SceneFiltered = s2.filter(ee.Filter.lt('CLOUDY_PIXEL_PERCENTAGE', 30));

var totalImagesAfterFilter = s2SceneFiltered.size();

print('Sentinel-2 - Number of images with 30% cloud filter: ', totalImagesAfterFilter);

// Pixel-level filtering

var cloudProbabilityFilter = function(image) {

var cloudProb = ee.ImageCollection('COPERNICUS/S2_SR_HARMONIZED')

.filterBounds(plots)

.filterDate(String(startDate) + '-01-01', String(endDate) + '-12-31')

.filter(ee.Filter.eq('system:index', image.get('system:index')))

.mean()

.select('MSK_CLDPRB');

var isCloud = cloudProb.lte(70); // Threshold

return image.updateMask(isCloud);

};

// QA60 cloud mask (optional)

function maskQA60(image) {

var qa = image.select('QA60');

var cloudBitMask = 1 << 10;

var cirrusBitMask = 1 << 11;

var mask = qa.bitwiseAnd(cloudBitMask).eq(0)

.and(qa.bitwiseAnd(cirrusBitMask).eq(0));

return image.updateMask(mask);

}

// Cloud and snow mask (optional)

function maskCloudsSnow(image) {

var opaqueClouds = image.select('MSK_CLASSI_OPAQUE').neq(1);

var cirrusClouds = image.select('MSK_CLASSI_CIRRUS').neq(1);

var snowProb = image.select('MSK_SNWPRB').neq(1);

return image.updateMask(opaqueClouds.and(cirrusClouds).and(snowProb));

}

// SCL band mask

function maskSCL(image) {

var scl = image.select('SCL');

var mask = scl.neq(1) // Saturated or defective

//.and(scl.neq(2)) // Dark area pixels

.and(scl.neq(3)) // Cloud shadows

//.and(scl.neq(8)) // Medium probability clouds

.and(scl.neq(9)) // High probability clouds

.and(scl.neq(10)) // Cirrus

.and(scl.neq(11)) // Snow/Ice

.and(scl.neq(6)); // Water

return image.updateMask(mask);

}

// Final filtered collection

var s2Filtered = ee.ImageCollection('COPERNICUS/S2_SR_HARMONIZED')

.filterDate(String(startDate) + '-01-01', String(endDate) + '-12-31')

.filterBounds(plots)

.filter(ee.Filter.lt('CLOUDY_PIXEL_PERCENTAGE', 70))

.map(cloudProbabilityFilter)

//.map(maskQA60)

.map(maskSCL);

//.map(maskCloudsSnow);

// Landsat 8

function maskL8sr(image) {

var qa = image.select('QA_PIXEL');

var mask = qa.bitwiseAnd(1 << 3).eq(0).and(qa.bitwiseAnd(1 << 4).eq(0));

return image.updateMask(mask);

}

function applyScaleFactors(image) {

var optical = image.select('SR_B.').multiply(0.0000275).add(-0.2);

var thermal = image.select('ST_B10').multiply(0.00341802).add(149.0).rename('ST');

return image.addBands(optical, null, true).addBands(thermal, null, true);

}

var l8 = ee.ImageCollection('LANDSAT/LC08/C02/T1_L2')

.filterDate(startDate, endDate)

.filterBounds(geometry)

.map(maskL8sr)

.map(applyScaleFactors);

// Calculate SAVI and NDMI

// SAVI calculation

var calculateSAVI = function(image) {

var L = 0.5; // Soil brightness correction factor

var savi = image.expression(

'((NIR - RED) / (NIR + RED + L)) * (1 + L)', {

'NIR': image.select('B8'),

'RED': image.select('B4'),

'L': L

}

).rename('SAVI');

return image.addBands(savi);

};

// NDMI calculation

var calculateNDMI = function(image) {

var ndmi = image.expression(

'(NIR - SWIR) / (NIR + SWIR)', {

'NIR': image.select('B8'),

'SWIR': image.select('B11')

}

).rename('NDMI');

return image.addBands(ndmi);

};

// Apply index calculations

var s2WithIndices = s2Filtered.map(calculateSAVI).map(calculateNDMI);

// Extract SAVI and NDMI values for each plot

var extractIndices = function(image) {

return image.reduceRegions({

collection: plots,

reducer: ee.Reducer.mean(),

scale: 10

}).map(function(feature) {

return feature.set('date', image.date().format('YYYY-MM-dd'));

});

};

var indicesCollection = s2WithIndices.map(extractIndices).flatten();

// Calculate LST

var medianL8 = l8.median();

var LSTm = medianL8.select('ST').subtract(273.15);

var constant = ee.Image(1);

var imgRegress = ee.Image.cat([

constant,

medianL8.select(['SR_B4', 'SR_B3', 'SR_B2', 'SR_B5', 'SR_B6', 'SR_B7']),

LSTm

]);

// 6. Coeficientes OLS

var ols = imgRegress.reduceRegion({

reducer: ee.Reducer.linearRegression({numX: 7, numY: 1}),

geometry: geometry,

scale: 30,

maxPixels: 1e10

});

var coefOls = ee.Array(ols.get('coefficients')).toList();

var b0 = ee.Number(ee.List(coefOls.get(0)).get(0));

var b4 = ee.Number(ee.List(coefOls.get(1)).get(0));

var b3 = ee.Number(ee.List(coefOls.get(2)).get(0));

var b2 = ee.Number(ee.List(coefOls.get(3)).get(0));

var b5 = ee.Number(ee.List(coefOls.get(4)).get(0));

var b6 = ee.Number(ee.List(coefOls.get(5)).get(0));

var b7 = ee.Number(ee.List(coefOls.get(6)).get(0));

// 7. Coeficientes RLS

var rls = imgRegress.reduceRegion({

reducer: ee.Reducer.robustLinearRegression({numX: 7, numY: 1}),

geometry: geometry,

scale: 30,

maxPixels: 1e10

});

var coefRls = ee.Array(rls.get('coefficients')).toList();

var b0r = ee.Number(ee.List(coefRls.get(0)).get(0));

var b4r = ee.Number(ee.List(coefRls.get(1)).get(0));

var b3r = ee.Number(ee.List(coefRls.get(2)).get(0));

var b2r = ee.Number(ee.List(coefRls.get(3)).get(0));

var b5r = ee.Number(ee.List(coefRls.get(4)).get(0));

var b6r = ee.Number(ee.List(coefRls.get(5)).get(0));

var b7r = ee.Number(ee.List(coefRls.get(6)).get(0));

var results = s2.map(function(image) {

var date = ee.Date(image.get('system:time_start')).format('YYYY-MM-dd');

// Apply LST models to each S2-image

var lst_ols = image.expression(

'b0 + b4*B4 + b3*B3 + b2*B2 + b5*B8 + b6*B11 + b7*B12', {

'B4': image.select('B4'),

'B3': image.select('B3'),

'B2': image.select('B2'),

'B8': image.select('B8'),

'B11': image.select('B11'),

'B12': image.select('B12'),

'b0': b0, 'b4': b4, 'b3': b3, 'b2': b2, 'b5': b5, 'b6': b6, 'b7': b7

}).rename('LST_OLS');

var lst_rls = image.expression(

'b0 + b4*B4 + b3*B3 + b2*B2 + b5*B8 + b6*B11 + b7*B12', {

'B4': image.select('B4'),

'B3': image.select('B3'),

'B2': image.select('B2'),

'B8': image.select('B8'),

'B11': image.select('B11'),

'B12': image.select('B12'),

'b0': b0r, 'b4': b4r, 'b3': b3r, 'b2': b2r, 'b5': b5r, 'b6': b6r, 'b7': b7r

}).rename('LST_RLS');

var ndvi_s2 = image.normalizedDifference(['B8', 'B4']);

var lst_dis = ndvi_s2.multiply(b1d).add(ndvi_s2.pow(2).multiply(b2d)).add(b0d).rename('LST_DisTrad');

var combined = ee.Image.cat([lst_ols, lst_rls, lst_dis])

.set('system:time_start', image.get('system:time_start'))

.set('date', date);

return combined;

});

// Extract LST values each point

var extract = function(image) {

return image.reduceRegions({

collection: surveys,

//properties: ['Longitude', 'Latitude', 'Altitude_', 'Releve_num'],

reducer: ee.Reducer.mean(), // o .median(), .mode(), etc.

scale: 10

}).map(function(f) {

return f.set('date', ee.Date(image.get('system:time_start')).format('YYYY-MM-dd'));

});

};

var samples = results.map(extract).flatten();

// Export results to CSV

Export.table.toDrive({

collection: indicesCollection,

description: 'SAVI_NDMI_LST_Values_filtered_2019_2025_100m',

fileFormat: 'CSV',

selectors: ['ID', 'Releve_num', 'date', 'SAVI', 'NDMI', 'OLS', 'RLS']

});

***Appendix 2****.* a) Partial final RDA results of physical soil properties showing the relationships between predictor variables and vegetation composition. b) Final RDA of physical soil properties selected after covariates elimination and partial RDA analysis. c) Final RDA of remote sensing predictors after eliminating covariates.

| **a)** | Spatial | | Topography | | Climate | | Soil | |
| --- | --- | --- | --- | --- | --- | --- | --- | --- |
| Variable | R2 | Variable | R2 | Variable | R2 | Variable | R2 |
| All species | PCNM3 | 0.028 | Altitude | 0.018 |  |  | Clay | 0.058 |
| PCNM1 | 0.0171 |  |  |  |  | Silt | 0.037 |
|  |  |  |  |  |  | Bulkdens | 0.025 |
| Dominant species | PCNM3 | 0.042 | Altitude | 0.034 |  |  | Clay | 0.072 |
| PCNM2 | 0.037 |  |  |  |  | Silt | 0.043 |
|  |  |  |  |  |  | Bulkdens | 0.041 |
|  |  |  |  |  |  |  |  |  |
| **b)** | All species | | Dominant species | |  |  |  |  |
| F-value | P-value | F-value | P-value |  |  |  |  |
| PCNM3 | 1.7716 | 0.042 | 2.613 | 0.02 |  |  |  |  |
| PCNM2 |  |  | 2.8032 | 0.024 |  |  |  |  |
| PCNM1 |  |  |  |  |  |  |  |  |
| Altitude |  |  | 2.9043 | 0.01 |  |  |  |  |
| Clay | 3.3469 | 0.002 | 4.0537 | 0.002 |  |  |  |  |
| Silt | 2.6083 | 0.004 |  |  |  |  |  |  |
| Bulkdens | 2.0464 | 0.018 |  |  |  |  |  |  |
| R2 adjusted | 0.151 | | 0.206 | |  |  |  |  |
|  |  |  |  |  |  |  |  |  |
| **c)** | All species | | Dominant species | |  |  |  |  |
| F-value | P-value | F-value | P-value |  |  |  |  |
| S2_RLS_LST_summer |  |  |  |  |  |  |  |  |
| S2_RLS_LST_autumn |  |  |  |  |  |  |  |  |
| NDMI_summer |  |  |  |  |  |  |  |  |
| TCW_summer |  |  |  |  |  |  |  |  |
| SAVI_summer | 6.8338 | 0.002 | 8.8561 | 0.002 |  |  |  |  |
| R2 adjusted | 0.15 | | 0.19 | |  |  |  |  |
